# Supplementary material for: Circulating tumor cells are associated with lung cancer subtypes: a large-scale retrospective study
Source: PubMed Central journal article supplement — Transl Lung Cancer Res. 2024 Nov 28;13(11):3122–38. doi: 10.21037/tlcr-24-955 (PMC11632433; doi:10.21037/tlcr-24-955), 2024-11-28
Supplement: tlcr-13-11-3122-dss.pdf [file tlcr-13-11-3122-dss.pdf]

## Data Sharing Statement

|                     |                                                                                                                                                    |                                                                                                                  |
|---------------------|----------------------------------------------------------------------------------------------------------------------------------------------------|------------------------------------------------------------------------------------------------------------------|
| <b>Article Info</b> | <a href="https://dx.doi.org/10.21037/tlcr-24-955">https://dx.doi.org/10.21037/tlcr-24-955</a>                                                      |                                                                                                                  |
| <b>Item</b>         | <b>Question</b>                                                                                                                                    | <b>Authors' Response<br/>(place "-" if not applicable)</b>                                                       |
| 1                   | Would you like to share data collected for your study to others?                                                                                   | Yes.                                                                                                             |
| 2                   | If not, would you like to share the reason for your decision?                                                                                      | -                                                                                                                |
| 3                   | What data in particular will be shared?                                                                                                            | The CTC data in particular will be shared.                                                                       |
| 4                   | Any other documents will be share? Such as study protocol, statistical analysis plan, informed consent form, clinical study report, analytic code. | Statistical analysis plan, informed consent form, and clinical study report will also be shared if requested.    |
| 5                   | When will data availability begin?                                                                                                                 | From the publication date.                                                                                       |
| 6                   | When will data availability end?                                                                                                                   | Two years within the publication date, since the technique or survival data may be updated over time.            |
| 7                   | To whom will you share the data?                                                                                                                   | Medical oncologists.                                                                                             |
| 8                   | For what type of analysis or purpose?                                                                                                              | For analysis to evaluate the use of CTC in lung cancer patients.                                                 |
| 9                   | How or where can the data/documents be obtained?                                                                                                   | Emails could be sent to the corresponding authors.                                                               |
| 10                  | Any other restrictions?                                                                                                                            | We may balance the potential benefits and risks for each request and then provide the data that could be shared. |
